# Sexual conflict and STIs: coevolution of sexually antagonistic host traits with a sexually transmitted infection

**Article Type:** *Main Article*

**Running Title:** Sexual Conflict and STIs

**Authors:** Alison M. Wardlaw, University of Toronto; University of Minnesota, [awardlaw@umn.edu](mailto:awardlaw@umn.edu)  
Aneil F. Agrawal, University of Toronto, [a.agrawal@utoronto.ca](mailto:a.agrawal@utoronto.ca)

## Keywords:

Sexual conflict  
Sexually transmitted infection  
Virulence evolution  
Coevolution  
Sexually antagonistic traits  
Disease  
Mating rate  
Host-parasite interactions

**Abstract Word Count:** 197

**Main Text Word Count:** 6271

**References:** 44

**Figures:** 4

**Tables:** 1

## Corresponding Author:

Alison M. Wardlaw  
Cargill Building (MPGI)  
Room 250  
1500 Gortner Ave.  
St. Paul, MN 55108  
USA  
Email: [awardlaw@umn.edu](mailto:awardlaw@umn.edu)  
Phone: 612-481-7903

**Contributions:** AMW and AFA conceived the idea, designed the model, and wrote the paper. AMW performed the analysis and wrote the simulations.

**Data:** Should the manuscript be accepted, Mathematica and Python code will be archived in Dryad and the data DOI will be included in the article.

## 38 Abstract

39 In many taxa, there is a conflict between the sexes over mating rate. The outcome of sexually  
 40 antagonistic coevolution depends on the costs of mating and natural selection against sexually  
 41 antagonistic traits. A sexually transmitted infection (STI) changes the relative strength of these  
 42 costs. We study the three-way evolutionary interaction between male persistence, female resistance,  
 43 and STI virulence for two types of STIs: a viability-reducing STI and a reproduction-reducing STI.  
 44 A viability-reducing STI escalates conflict between the sexes. This leads to increased STI virulence  
 45 (i.e., full coevolution) if the costs of sexually antagonistic traits occur through viability but not if the  
 46 costs occur through reproduction. In contrast, a reproduction-reducing STI de-escalates the sexual  
 47 conflict but STI virulence does not coevolve in response. We also investigated the establishment  
 48 probability of STIs under different combinations of evolvability. Successful invasion by a viability-  
 49 reducing STI becomes less likely if hosts (but not parasite) are evolvable, especially if only the  
 50 female trait can evolve. A reproduction-reducing STI can almost always invade because it does  
 51 not kill its host. We discuss how the evolution of host and parasite traits in a system with sexual  
 52 conflict differ from a system with female mate choice.

## 53 Introduction

54 Sexual conflict over mating rate arises when male reproductive success increases with mating rate  
 55 while female reproductive success is maximized at some intermediate rate (Bateman, 1948; Arnqvist  
 56 and Rowe, 2005). Males evolve persistence traits to increase their mating or fertilization rate that  
 57 often cause harm to females physically or physiologically. Females, in turn, evolve resistance traits  
 58 that deter males or offset the physiological harm. This conflict gives rise to sexually antagonistic  
 59 coevolution between male persistence traits and female resistance traits, the outcome of which  
 60 determines the mating rate. Sexually transmitted infections (STIs) are, by definition, transmitted  
 61 during mating and thus may play an important role in the evolution of host mating strategies.  
 62 Here, we explore the interplay between STI virulence evolution and the evolution of host traits  
 63 mediating sexual conflict over mating rate.

The virulence of STIs that affect host mortality are predicted to evolve in much the same way as that of an ordinary infectious disease, i.e., evolutionary stable virulence is proportional to the natural host mortality rate and depends on the shape of the trade-off between transmission and virulence (Knell, 1999). Surprisingly, evolutionarily stable virulence of an STI does not depend on the mating rate, though its spread and infection prevalence does (Lipsitch and Nowak, 1995; Knell, 1999). STIs, in turn, are known to affect the evolution of mating strategies. Theory has focused on STIs in hosts with conventional sexual selection involving female mate choice. Traditionally, STIs were thought to select for monogamy (Immerman, 1986; Immerman and Mackey, 1997) but subsequent models showed that STIs can maintain both monogamy and promiscuity in a population, as well as select for risky female choice (Thrall et al., 1997; Boots and Knell, 2002; Kokko et al., 2002). (Female choosiness based on attractiveness of males is considered a risky strategy because the most popular males have the highest mating rate and are most likely to be infected.)

By altering the mating system, the STI changes its own ecological landscape, possibly setting the stage for coevolution. The outcome of coevolution can be hard to intuit. Indeed, there are several examples in the host-parasite literature of coevolution leading to different or unexpected outcomes compared to the evolution of either host or parasite in isolation (Gandon et al., 2002; Day and Burns, 2003; Best and White, 2009). Of particular interest is a model that considers the coevolution of host mate choosiness with virulence of an STI that affects host fecundity (Ashby and Boots, 2015). An investigation of STI virulence in the absence of host coevolution showed that a parasite that reduces the mating success of its host should evolve to be less virulent. Knell (1999) suggested that hosts would subsequently lose disease-avoidance behaviours such as mate choice based on the degree of parasitism of potential mates. However, when the level of host choosiness based on parasitism was allowed to coevolve with STI virulence, Ashby and Boots (2015) found that intermediate levels of disease-avoidance behaviour and virulence could evolve, and that coevolutionary cycling could occur between host choosiness and STI virulence. These unexpected results emphasize the importance of considering possible coevolutionary feedbacks of an STI with host mating system.

Over the last 25 years, it has become clear that, in many systems, sexual conflict over mating

rate plays at least as large a role in shaping the evolution of male-female interactions as conventional sexual selection processes (Rice and Holland, 1997; Arnqvist and Rowe, 2005). In the absence of an STI, there are several possible outcomes of sexually antagonistic coevolution depending on the biology of the system. If male persistence and female resistance carry no inherent cost, traits will continually escalate in an evolutionary arms race (Gavrilets and Hayashi, 2006). Incorporating natural selection against persistence and resistance traits prevents runaway evolution (Gavrilets et al., 2001) and allowing for the evolution of female sensitivity can lead to female indifference to male traits, halting the coevolutionary process (Rowe et al., 2005). In all of these cases, only females suffer the cost of mating. Given that a sexually transmitted infection increases the cost of mating to both males and females it is not obvious how an STI will affect sexually antagonistic host interactions. Though classic theory indicates that the ESS virulence of an STI is unaffected by mating rates, there remains the potential for host-parasite coevolution. Because the traits mediating sexual conflict are themselves costly, evolutionary changes in these traits driven by the emergence of an STI might create epidemiological feedbacks that drive subsequent STI evolution.

We model an STI in a host system with sexual conflict over mating rate., i.e., the STI can coevolve with sexually antagonistic host traits (male persistence and female resistance). We examine how an STI changes the escalation of sexually antagonistic traits in the host, as well as how the evolution of these host traits affects whether an STI can establish and, if so, the evolution of STI virulence. The fitness of a host is determined by both its viability and its reproductive output whereas these two fitness components of the host are not equally important to the fitness of a sexually (horizontally) transmitted infection. For this reason, we consider separately cases where the fitness costs of the host's sexually antagonistic traits occur through viability versus reproduction. In addition, we separately examine an STI that reduces host fitness via mortality and one that reduces sexual fitness (i.e., female fecundity and male mating success); we refer to these as “viability-reducing STI” and “reproduction-reducing STI” models, respectively. We highlight how the evolutionary outcomes that occur in cases where costs of sexually antagonistic traits and/or STI virulence manifest through host mortality contrast with cases where they manifest through host reproduction.

## Model Setup

We take as our focal case the model with a viability-reducing STI where the costs of sexually antagonistic (SA) traits are manifest through reductions in viability (hereafter “viability-reducing STI” and “viability costs for SA traits”). Other cases are subsequently described with respect to how they differ from this focal case. The results presented are from individual-based simulations. Numerical solutions of an analytical model of the focal case are similar (Supplementary Material).

## Host Life Cycle without the STI

We model an interlocus sexual conflict over mating rate by assuming sex-limited expression of male and female traits (each controlled by a single additive diploid locus). A male is characterized by his persistence trait and a female her resistance trait; these traits may be morphological (e.g., male grasping and female anti-grasping traits of water striders; Arnqvist and Rowe 2002) or behavioural (e.g., harassment by males or vigorous struggles by females in water striders; Arnqvist 1989). Resistance ( $x$ ) and persistence ( $y$ ) levels expressed by a host are calculated as the average of the trait values from each chromosome (e.g.,  $x = (x_1 + x_2)/2$  where  $x_1$  is the resistance allele on chromosome one and  $x_2$  is the resistance allele on chromosome two). Definitions of key parameters are provided in Table 1.

Each breeding season, a female encounters a certain number of males, randomly drawn from a Poisson distribution with mean  $\alpha$ . The probability of mating during an encounter between a male with persistence  $y$  and a female with resistance  $x$  is an increasing function of the difference  $u = y - x$  as given by  $\phi[u] = 1/(1 + e^{-u})$  (following Gavrillets et al. 2001 and Rowe et al. 2005). The mating rate  $\phi[u]$  plays several roles in the model. Importantly, it affects female mortality as females pay a viability cost  $d$  per mating. The mating rate also affects female fecundity in that a given female can have zero fitness if she remains unmated (at low mating rates) by the end of the breeding season. A mated female has maximum fecundity  $b$  (per breeding season) that is decreased by density-dependence if population size exceeds the carrying capacity  $K$ .

Mortality occurs after mating but prior to offspring production. Males and females suffer baseline mortality rates,  $\mu_m$  and  $\mu_f$ , respectively, and face nonlinearly increasing costs of expressing

their respective sexually antagonistic traits. A male pays a cost for his persistence trait; the strength of this cost is  $ce^y$  where  $c$  is the “persistence cost” parameter. Likewise, a female pays a mortality cost for her resistance trait given by  $\delta e^y$  where  $\delta$  is the “resistance cost” parameter. Viability selection against these sexually antagonistic traits, together with the cost of mating experienced by females, results in three costs incurred by hosts (persistence costs to males as well as resistance and mating costs to females). After mating (but before giving birth), adult females die with probability  $(1 - e^{-(\mu_f + \delta e^x + dm)})$  and adult males die with probability  $(1 - e^{-(\mu_m + ce^y)})$ .

Surviving females produce offspring. The number of offspring born to a mated female is drawn from a Poisson distribution with mean  $b(1 - (M + F)/K)$  where  $M$  and  $F$  are the number of adult males and females in the population. If a female has mated with multiple males (let  $m$  be the number of males she mated with), a given male sires an average of  $1/m$  of her offspring, with the actual sire of each offspring chosen at random from the  $m$  males. Gametes are formed with free recombination between loci and alleles experience mutation with probability  $U_{\text{hosts}}$  per locus. Effect size of a mutation is chosen from a normal distribution with a mean of zero and standard deviation of 0.1. If the mutational step yields a negative trait value, the trait value is assumed to be zero. The surviving adults and newborn offspring make up the next generation, whose mean and variance in host trait values are recorded before undergoing another round of selection, mating, and mutation.

165

## 166 Inclusion of a Viability-Reducing STI

If an STI is present in the population, it can be transmitted from an infected individual to an uninfected (“susceptible”) individual with probability  $\beta[v]$ , given a mating between them.  $\beta[v]$  is a function of STI virulence,  $v$ , and takes the standard form  $\beta[v] = v/(w + v)$ , where  $w$  determines the shape of the trade-off between transmission and virulence (see Otto and Day, 2007, Chapter 12). An infected host suffers additional mortality  $v$ , e.g., adult males die with probability  $(1 - e^{-(\mu_m + ce^y + v)})$ . A newly infected host cannot infect other hosts during the same breeding period in which it became infected itself, i.e., the newly infected host must survive to the next breeding

Table 1: Parameters and Variables

| Parameter   | Definition                                 |
|-------------|--------------------------------------------|
| $y$         | male persistence trait                     |
| $x$         | female resistance trait                    |
| $u = y - x$ | mating rate metric                         |
| $\phi[u]$   | mating probability function                |
| $c$         | persistence cost to males                  |
| $\delta$    | resistance cost to females                 |
| $d$         | mating cost to females                     |
| $\alpha$    | number of males encountered                |
| $b$         | maximum fecundity                          |
| $K$         | carrying capacity                          |
| $M$         | number of males in the population          |
| $F$         | number of females in the population        |
| $m$         | number of males a given female mates with  |
| $\mu_i$     | baseline mortality coefficient of sex $i$  |
| $v$         | virulence of the STI                       |
| $\beta[v]$  | STI transmission function                  |
| $w$         | transmission-virulence trade-off parameter |

174 period before it is infectious. During this latent period, the STI undergoes mutation with proba-  
175 bility  $U_{\text{STI}}$ . Effect size of a mutation is chosen from a normal distribution with a mean of zero and  
176 standard deviation of 0.01. If the mutational step yields negative virulence, virulence is assumed to  
177 be zero. At the start of each generation, the population mean and variance in virulence are recorded.  
178

## 179 **Reproduction Costs for SA Traits**

180 Simulations proceed as above except the cost of sexually antagonistic traits affects aspects of re-  
181 production instead of viability. Higher resistance trait values reduce female fecundity such that  
182 the number of offspring born to a mated female is drawn from a Poisson distribution with mean  
183  $e^{-\delta e^x} b(1 - (M + F)/K)$ . Higher persistence trait values reduce male fertility by decreasing siring

184 success (i.e., the male's persistence trait increases his expected number of matings but decreases his  
185 postcopulatory competitive ability). Specifically, having mated with a given female, a male sires an  
186 average of  $e^{-ce^y} / \sum_{i=1}^m e^{-ce^{y_i}}$  of her offspring, where  $m$  is the total number of males she mated with  
187 and  $y_i$  is the persistence trait of male  $i$ .

## 188 **Reproduction-Reducing STI**

189 Simulations with a reproduction-reducing STI proceed as described for a viability-reducing STI  
190 except disease virulence affects host fitness through aspects of reproduction. Female fecundity is  
191 reduced by infection such that the number of offspring born to a mated female is drawn from a  
192 Poisson distribution with mean  $e^{-vb}(1 - (M + F)/K)$ . To prevent continually escalating virulence  
193 evolution, a reproduction-reducing STI faces a transmission-virulence trade-off in males. Infected  
194 males have a lower probability of mating with an encountered female than an uninfected male with  
195 the same persistence trait value; infected males can be considered as exhibiting lower mating effort  
196 than uninfected males. Specifically, the probability of mating with an infected male is  $e^{-v}\phi[u]$ .  
197 Note that like a viability-reducing STI, there is a latent period before an individual is infectious.

## 198 **Initial Conditions**

199 Individual-based simulations were carried out in Python (available upon request) for 50,000 gen-  
200 erations, well after the trait values appeared to reach evolutionary equilibrium. To initiate the  
201 population, diploid hosts are assigned trait values at the resistance and persistence loci by drawing  
202 random values from a normal distribution with mean  $\bar{x}$  and  $\bar{y}$ , respectively, and standard deviation  
203 0.5. In host populations infected with a sexually transmitted infection (STI), the STI is introduced  
204 into 5% of hosts with the virulence of each infection drawn from a normal distribution with mean  
205  $\bar{v}$  and standard deviation 0.1. Values from the last 1000 generations were averaged and reported in  
206 Figs. 1 and 4. Rare stochastic extinctions of the host population are excluded from the average.

## Results

### Evolution of Host Traits without an STI

To understand how a coevolving STI affects the outcome of sexually antagonistic coevolution we first consider how the host evolves in the absence of an STI (which has been previously studied for ‘mortality costs’ of sexually antagonistic (SA) host traits, e.g., Gavrillets et al. 2001). Rather than reporting the SA traits directly, it is more useful to consider two other metrics instead. The average of the two trait values,  $(y + x)/2$ , is an indicator of the degree of escalation in the SA traits (hereafter, “conflict escalation”) and is plotted in Fig. 1A-C. Second, we plot the difference between male persistence and female resistance,  $u = y - x$  (hereafter, “mating rate metric”) because the mating rate is an increasing function of this difference (Fig. 1D-F). The evolutionary equilibrium trait values presented in Fig. 1 and all subsequent figures are stable to different initial values.

For the range of parameters shown in Fig. 1, male persistence  $y$  always exceeds female resistance  $x$ , so the mating rate metric  $u$  is positive and mating rates are not too low. The extent of conflict escalation, as reflected by average trait values, increases substantially as the mating cost to females increases (Fig. 1A). This is driven by the female trait increasing to reduce the mating rate, while the male trait increases only slightly in response because of the nonlinearly increasing cost of natural selection. Because female resistance increases more than male persistence, the mating rate metric  $u$  declines (Fig. 1D) with increased mating cost. Conflict escalation does not change drastically with increasing cost of male persistence (Fig. 1B) but there is a reduction in the mating rate (Fig. 1E). In contrast, increasing the cost of female resistance leads to a decline in conflict escalation (Fig. 1C) accompanied by an increase in the mating rate metric (Fig. 1F). At high resistance costs, females with lower resistance better balance the costs of mating with the costs of their SA trait. Qualitatively similar patterns are observed when the costs for sexually antagonistic traits occur through reproduction (Fig. S1) rather than viability (Fig. 1), although there is a noticeable decrease in the mating rate metric.

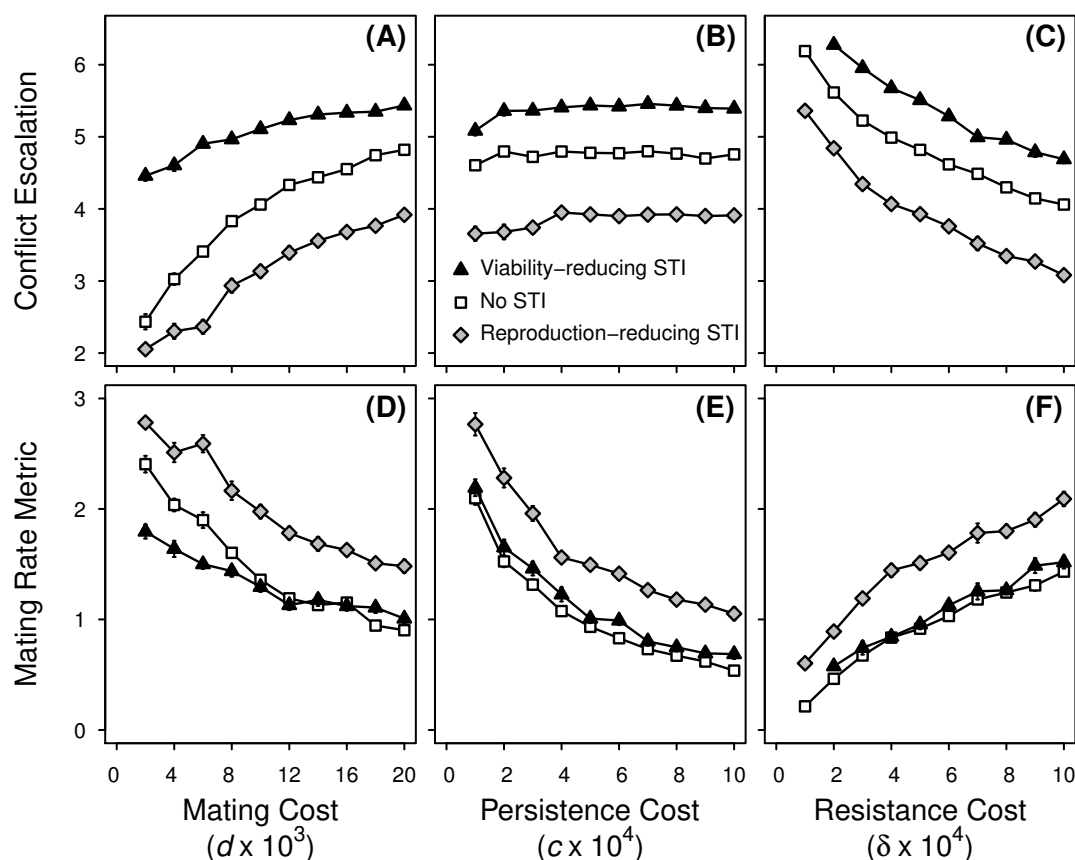

Figure 1: The outcome of coevolution between males and females in the absence of an STI and in the presence of two types of evolving STIs. Both sexes pay viability costs for expressing sexually antagonistic traits. Shown here are the degree of escalation in sexual conflict, measured as the average of  $y$  and  $x$  (A - C), and the difference between persistence,  $y$ , and resistance,  $x$  (D - F); values are at evolutionary equilibrium. The mating rate is an increasing function of the difference between male persistence and female resistance ( $y - x$ ); thus, we label this difference the ‘mating rate metric’. Simulations with an evolving STI began at the STI-absent host trait values and the results for a reproduction-reducing STI (diamonds) and a viability-reducing STI (triangles) are a three-way evolutionary equilibrium with the STI at evolutionary equilibrium virulence  $v$  (see Fig. 4A). Parameter values (unless shown otherwise):  $\alpha = 10$ ,  $\mu = 0.2$ ,  $b = 4$ ,  $K = 1000$ ,  $w = 1$ , with  $c = 0.0005$ ,  $\delta = 0.0005$ ,  $d = 0.02$ . Each point represents the average of 20 independent simulations  $\pm$  standard error. Simulations in which the disease went extinct are excluded from calculating the average. At very low resistance costs, a viability-reducing STI went extinct in 100% of simulations (see Fig. 3) and there is no data for the three-way evolutionary equilibrium. Qualitatively similar patterns are observed when hosts pay reproduction costs for expressing sexually antagonistic traits (see Supplementary Material Fig. S1).

## 232 Evolution of Host Traits with an Evolving STI

### 233 Viability-Reducing STI

234 We now consider the evolution of host traits in the presence of an evolving sexually transmitted  
 235 infection and then later discuss virulence of the STI. We begin by examining a viability-reducing STI  
 236 in a host where the costs of SA traits occur through viability effects. The introduction of an evolving  
 237 viability-reducing STI escalates the conflict between the sexes (Fig. 1). (A viability-reducing STI  
 238 also causes an increase in conflict escalation if costs of SA traits occur through reproduction, though  
 239 the increase is smaller; Fig. S1.) This increase is driven by females. If only the females are allowed  
 240 to evolve (not shown), female resistance will evolve to be higher than male persistence to reduce  
 241 the additional cost of mating arising from the risk of STI infection. In this case,  $u = y - x$  is  
 242 negative and the mating rate drops to low levels. A viability-reducing STI cannot persist at low  
 243 mating rates. In contrast, if only the males are allowed to evolve (not shown), male persistence  
 244 increases from its STI-absent equilibrium, presumably because males are selected to more quickly  
 245 obtain additional mates in the face of higher mortality rates due to infection (though the change is  
 246 smaller compared to the case where females evolve). The STI does not go extinct because mating  
 247 rates remain high (as  $u$  increases). When females and males can both evolve, the increase in female  
 248 resistance invokes a subsequent increase in male persistence so males ensure mating (Fig. 2A).  
 249 As such, the net effect of coevolutionary feedback tends to be increased average trait values (i.e.,  
 250 increased conflict escalation). It is worth emphasizing that the evolution of male persistence in  
 251 response to the escalation in female resistance allows the STI to remain in the system. If a lack of  
 252 genetic variation in the male trait prevented its coevolution, the STI would go extinct after female  
 253 resistance increased and caused a decrease in mating rates.

### 254 Reproduction-Reducing STI

255 A reproduction-reducing STI has qualitatively different consequences for the outcome of sexual  
 256 conflict. Again, this outcome can be understood by first thinking about the evolution of each sex  
 257 in isolation. If only females are allowed to evolve (not shown), female resistance decreases in the  
 258 presence of a reproduction-reducing STI. A prevalent STI results in less mating pressure on females

259 because infected males exhibit reduced mating effort compared to uninfected males. Consequently,  
 260 females do not need to invest as much in costly resistance traits. If only males are allowed to evolve,  
 261 there is no observed change in the male persistence trait. When males and females can both evolve,  
 262 the decrease in female resistance allows male persistence to decrease slightly (although to a lesser  
 263 extent). Thus, in contrast to a viability-reducing STI, a reproduction-reducing STI decreases the  
 264 degree of conflict escalation (Fig. 1A-C, Fig. 2B). This is also true if the costs of the SA traits  
 265 occur through reproduction (Fig. S1) rather than viability (Fig. 1). In contrast to a viability-  
 266 reducing STI, evolution of either host sex never drives a reproduction-reducing STI extinct for the  
 267 parameters examined here.

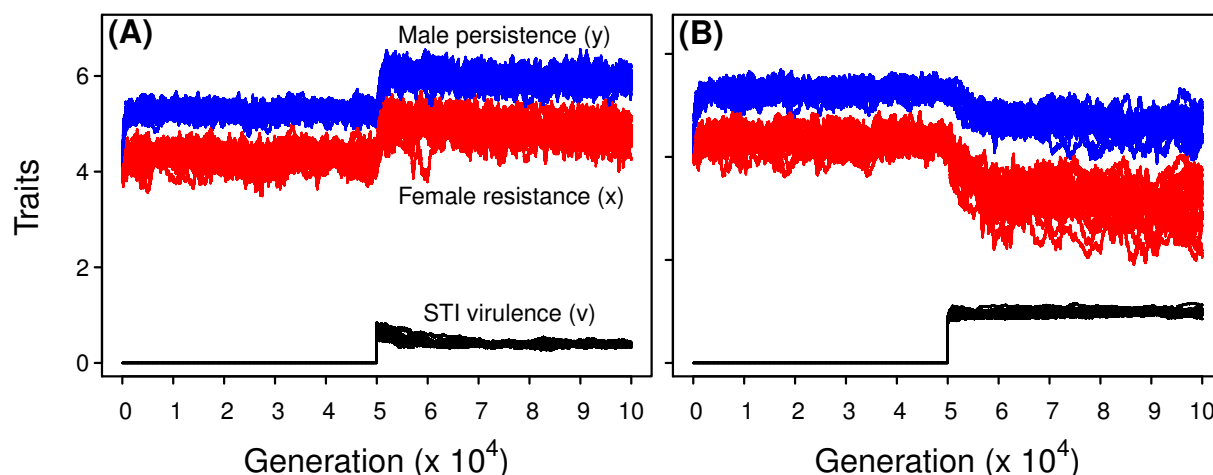

Figure 2: Sample runs from individual-based simulations (20 replicates) where hosts evolve to their disease-absent equilibrium values before a viability-reducing STI (A) or a reproduction-reducing STI (B) is introduced. Male persistence is shown in blue, female resistance in red, and STI virulence in black. Parameter values:  $\alpha = 10$ ,  $\mu = 0.2$ ,  $b = 4$ ,  $K = 1000$ ,  $w = 1$ ,  $d = 0.02$ ,  $c = 0.0005$ ,  $\delta = 0.0005$ .

## 268 Establishment of the Sexually Transmitted Infection

269 In the section above, we focused on cases where both hosts and parasites can evolve and the disease  
 270 establishes itself within the host population. (We use the term disease “establishment” rather than  
 271 the more typical term “persistence” to avoid confusion with the host male’s “persistence” trait.)

We now focus on understanding how a lack of genetic variation that prevents evolution of either host or parasite traits affects both the establishment and virulence of the STI. We discussed one important case above in which a lack of genetic variation in the male trait but not the female trait prevents the establishment of an evolving viability-reducing STI. Here we focus on contrasts between hosts and parasites in their evolvability (rather than on differences in evolvability between male and female host traits).

When neither the host nor parasite can evolve, a viability-reducing STI near its equilibrium virulence always establishes when introduced into host populations at equilibrium except for rare stochastic extinctions (for the parameter values considered here). In comparison, a relatively avirulent viability-reducing STI almost always goes extinct and a highly virulent one (shown in Fig. 3, open symbols) establishes unless mating rates are very low (i.e., when mating costs are high and there are high persistence costs to males or low resistance costs to females). In contrast, in all cases examined, a reproduction-reducing STI establishes regardless of whether it was introduced at low, high, or equilibrium virulence. By virtue of not killing its host, a fertility STI has a long duration of infection and can establish and spread at very low mating rates through rare transmission events. Because of the ease of establishment of a reproduction-reducing STI (for all combinations of evolvability), further discussion of extinction rates and the accompanying figure (Fig. 3) pertain only to a viability-reducing STI.

If the host but not the parasite can evolve, then females are selected to increase their SA resistance trait in the presence of a viability-reducing STI, driving an increase in average host trait values and a decrease in the difference between the sexes (not shown). The accompanying decrease in mating rate can drive a highly virulent, non-evolving STI extinct (i.e., at high persistence costs to males, low resistance costs to females, and high mating costs to females). In Fig. 3 we show the fraction of runs in which the parasite went extinct when hosts can evolve but parasites cannot (black symbols). Extinction rates are higher over a wider range of parameter values when female resistance costs are low ( $\delta = 0.0001$ , data not shown). As noted above, STI extinction is even more likely if the female trait can evolve but the male trait cannot. For any of the parameter values shown in Fig. 3 a viability-reducing STI is unable to invade if only the female host trait evolves

(not shown). If the STI can evolve but hosts cannot evolve, an initially virulent viability-reducing STI only goes extinct for very low mating rates (not shown).

Finally, we consider evolution in both the host and the STI (gray symbols, Fig. 3). STI extinction occurs most often when the cost of resistance to females is low (Fig. 3C). At low resistance costs, elevated female trait values quickly evolve in the presence of the STI, which lowers the mating rate enough (albeit, transiently) that a viability-reducing STI goes extinct due to lack of transmission opportunity. When the STI can coevolve with an evolving host, it is likely to successfully establish across a wide range of conditions under which it would otherwise go extinct (Fig. 3). Contrasting the case where the costs of sexual antagonism are paid through viability (Fig. 3) rather than reproduction (Fig. S2), the STI is more likely to go extinct in the latter scenario for most parameter values. Differences between these scenarios in STI establishment probability are likely driven by the pronounced decrease in mating rate accompanying the introduction of the STI in host populations paying costs for SA traits through reproduction (compare Fig. 1D-F to Fig. S1D-F).

# **Virulence of a Viability-Reducing STI**

Conditional on establishment of a viability-reducing STI, three-way evolution of the STI with male and female host traits can give rise to quantitatively different results than if the STI was introduced into a non-evolving host population (Fig. 4A-C). A viability-reducing STI becomes more virulent if hosts coevolve than if they do not, but only if the cost of SA traits occur through viability. This is because the addition of the STI to the system causes evolutionary increases in female resistance and, consequently, male persistence, thereby increasing the host mortality rate; optimal STI virulence is expected to increase with host mortality rate (Knell, 1999). The equilibrium virulence of a viability-reducing STI increases as the average host trait values increase and does not depend on the difference in trait values. The difference in trait values only affects the establishment and prevalence of the STI and not its evolutionary equilibrium virulence. In contrast, when the cost of SA traits occur through reproduction, the virulence of a viability-reducing STI does not increase with an evolving host (Fig. 4A-C) even where there is host conflict escalation in the presence of

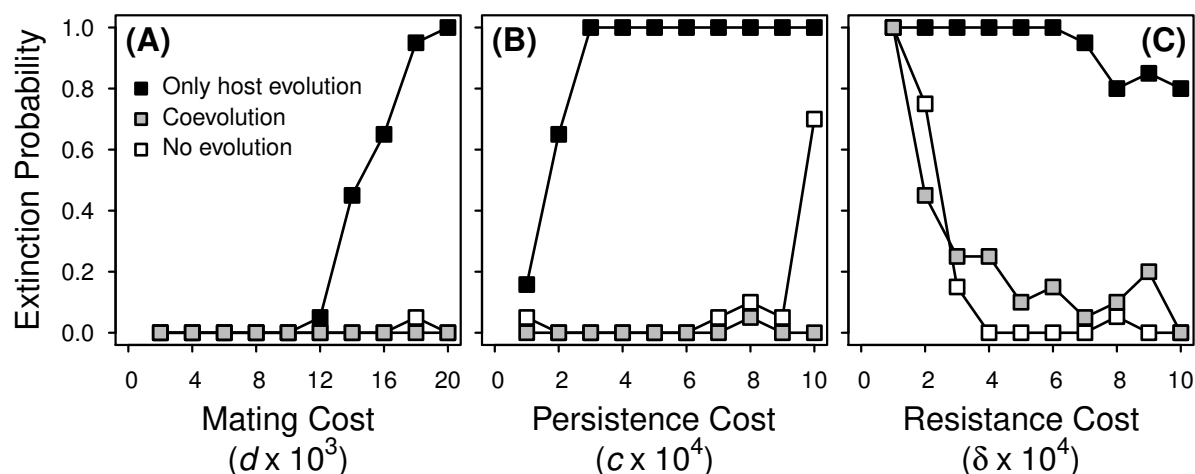

Figure 3: Fraction of simulation runs where a highly virulent viability-reducing STI was driven extinct in hosts paying viability costs. The parasite was introduced with  $v = 0.8$  at the STI-absent male persistence and female resistance host trait values and neither host nor parasite evolved (open symbols), host traits evolved in the presence of a non-evolving parasite (black symbols), or hosts and STI both evolved (gray symbols). Parameter values (unless shown otherwise):  $\alpha = 10$ ,  $\mu = 0.2$ ,  $b = 4$ ,  $K = 1000$ ,  $w = 1$ , with  $c = 0.0005$ ,  $\delta = 0.0005$ , and  $d = 0.02$ . The extinction probability was determined from 20 independent simulations. STI extinction probability was slightly higher, on average, in hosts paying reproduction costs for sexually antagonistic traits, but overall patterns of extinction probability were qualitatively similar (Supplementary Material Fig. S1).

the STI (Fig. S1A-C). Escalated male and female trait values do not increase host mortality and invoke subsequent coevolution of the STI.

## Virulence of a Reproduction-Reducing STI

Virulence evolution of a reproduction-reducing STI is shaped by its effects on males. In infected females, a reproduction-reducing STI does not face a transmission-virulence trade-off because the consequences of infection (decreased fecundity) do not reduce transmission opportunities. However, infected males in our model suffer reduced mating success with females. Thus, males infected with a highly virulent reproduction-reducing STI do not mate as often as uninfected males with similar persistence trait values. This reduction in transmission opportunities creates a transmission-

virulence trade-off in one sex (males) that limits virulence evolution. The transmission-virulence trade-off is not affected by the host trait values themselves, regardless of whether costs of SA traits are paid through viability or reproduction. Consequently, the evolution of sexually antagonistic host traits induced by the presence of a reproduction-reproducing STI does not invoke a corresponding response in STI virulence evolution. In the absence of a coevolutionary response, virulence of a reproduction-reducing STI is the same in host populations that can and cannot evolve (Fig. 4D-F).

## Comparison with a Horizontally Transmitted Disease

In our focal case, a viability-reducing STI coevolves with a host population paying SA costs through viability. As noted, STI virulence evolution depends on host mortality much like a horizontally transmitted disease or “ordinary infectious disease” (OID). Furthermore, STI virulence in our model causes disease-induced mortality. Given that both STI and OID virulence affect viability and are shaped by the same parameters, we might expect similar co-evolutionary outcomes if we model an OID infecting hosts with sexual conflict over mating rate. An OID, however, is not transmitted sexually and therefore will not exert direct selection on females to reduce the mating rate. We find that an OID has the same effect on the outcome of the conflict as increasing the baseline mortality rate  $\mu$  (not shown). In contrast to a viability-reducing STI, an OID has little effect on the extent of conflict escalation. However, an OID drives an increase in the mating rate metric because male persistence increases and female resistance decreases.

## Discussion

Although the evolution of STI virulence and sexual conflict have each been studied in isolation (e.g., STIs: Knell 1999; Lipsitch and Nowak 1995, sexual conflict: Gavrillets et al. 2001; Gavrillets and Hayashi 2006), the link between them has received little attention. The models presented here are aimed at understanding this connection. In some cases, each species reciprocally affects the evolution of the other (i.e., true coevolution) whereas in other cases only one species evolves in response to the other. Whether, and in which direction, each species evolves in response to the other depends on how trade-offs are structured.

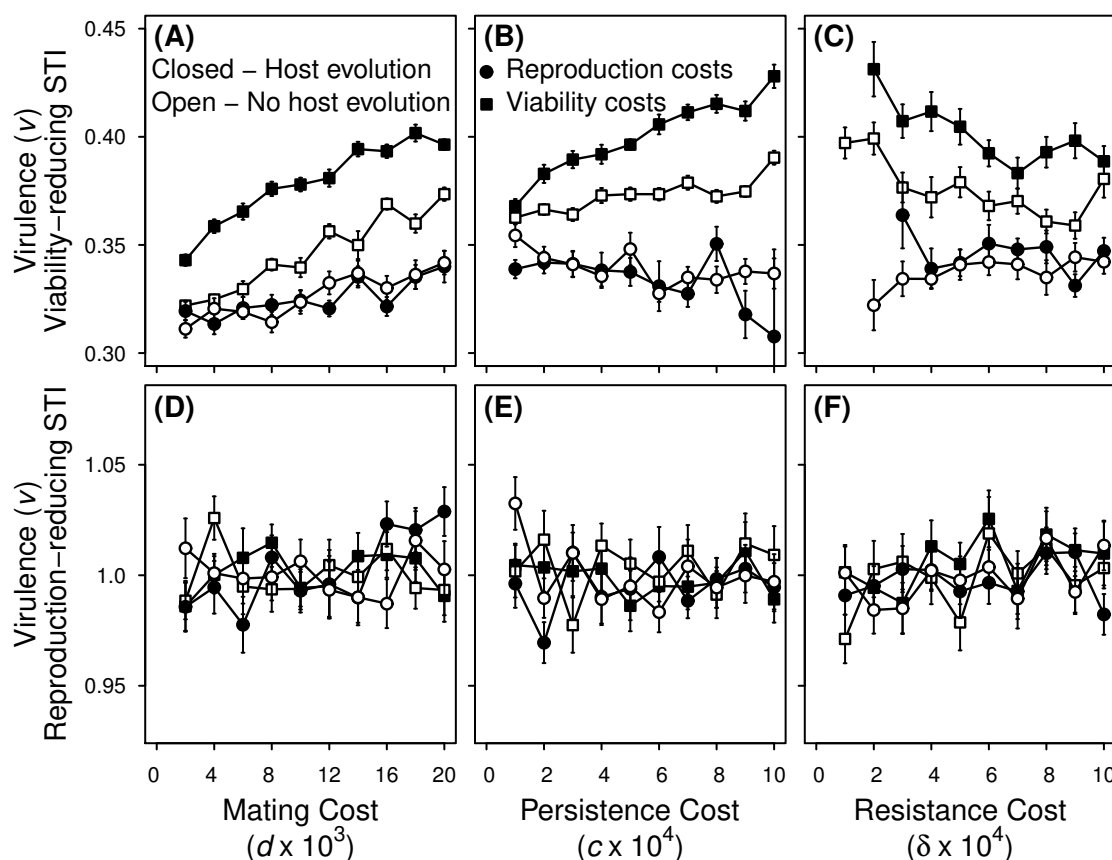

Figure 4: Evolutionary equilibrium virulence of two types of evolving STIs in a population where hosts do not evolve (open symbols) or do evolve (closed symbols). Virulence of a viability-reducing STI (A-C) and a reproduction-reducing STI (D-F). In both cases, the parasite was introduced with  $v = 0.8$  at the STI-absent male persistence and female resistance host trait values. Parameter values (unless shown otherwise):  $\alpha = 10$ ,  $\mu = 0.2$ ,  $b = 4$ ,  $K = 1000$ ,  $w = 1$ , with  $c = 0.0005$ ,  $\delta = 0.0005$ ,  $d = 0.02$ . Each point represents the average of 20 independent simulations  $\pm$  standard error. Simulations in which the disease went extinct are excluded from calculating the average and can lead to larger error bars at high extinction probabilities. At very low resistance costs a viability-reducing STI infecting hosts paying viability costs went extinct in 100% of simulations (see Fig. 3) and there is no data for the three-way evolutionary equilibrium.

362 We found that a sexually transmitted infection affects the level of escalation of traits mediating  
363 sexual conflict within the host, but that viability-reducing STIs and reproduction-reducing STIs  
364 do so in opposite ways. The introduction of a viability-reducing STI escalates the conflict. Female

365 resistance increases to reduce the additional cost of mating imposed by the risk of disease infection.  
 366 Male persistence increases to stay above increasing female resistance levels. Thus, average host  
 367 trait values increase, i.e., there is elevated conflict escalation. If the cost of SA traits occurs  
 368 through viability, then a co-evolving viability-reducing STI increases its virulence level in response  
 369 to these changes in the host, not because of a change in host mating rate but rather because of  
 370 the increased host death rate resulting from the escalated sexual conflict. In contrast, if the cost  
 371 of SA traits occurs through reproduction, then increased conflict escalation evolves in response to  
 372 a viability-reducing STI but in this case there is no feedback affecting virulence evolution.

373 In both cases described above, the three traits reach a stable equilibrium. We find no evi-  
 374 dence of cycling as has been observed under some conditions in a coevolution STI model involving  
 375 conventional sexual selection Ashby and Boots (2015). Based on our understanding of why the  
 376 observed changes occur, cycling is not expected. Stabilizing selection maintains the evolutionary  
 377 equilibrium. Male persistence increases male reproductive success at the expense of other costs  
 378 associated with persistence such as increased predation risk (Rowe, 1994) or reduced foraging time  
 379 (Robinson and Doyle, 1985). Females suffer costs of mating but must balance these with the direct  
 380 cost of expressing the resistance trait and the risk of remaining unfertilized if resistance is too high.  
 381 In the presence of a viability-reducing STI, males experience stronger selection to obtain mates  
 382 quickly in the face of higher total mortality and females experience stronger selection to reduce  
 383 the additional cost of mating associated with a prevalent STI. The escalation of sexual conflict  
 384 increases total host mortality, selecting for higher STI virulence, which in turn should drive further  
 385 escalation of the sexual conflict traits. However, the “faster than linear” increasing costs to hosts  
 386 of the escalating sexual conflict traits and the “slower than linear” increasing transmission benefits  
 387 of increased STI virulence ensures that the system reaches an equilibrium rather than evolving  
 388 to ever higher levels of all three traits. (Such non-linear costs are a common assumption in both  
 389 sexual conflict and virulence models and are necessary to have sensible equilibria (e.g., Gavrillets  
 390 et al. 2001 and Otto and Day 2007).) Evolutionary equilibrium is even easier to understand when  
 391 hosts pay costs of SA traits through reproduction because then conflict escalation does not select  
 392 for higher STI virulence and create the potential for a host-STI arms race.

Compared to viability-reducing STIs, reproduction-reducing STIs have the opposite effect on the outcome of sexual conflict: a reproduction-reducing STI de-escalates the conflict. Females evolve lower resistance in response to the alleviation in mating pressure they experience because infected males have reduced mating success. The accompanying (but smaller) decline in the male trait contributes to conflict de-escalation. Regardless of whether hosts pay the cost of SA traits through viability or reproduction, virulence of a reproduction-reducing STI does not seem to be affected by the decrease in average host trait values. All three traits reach evolutionary equilibrium due to stabilizing selection. Continual de-escalation of the conflict is prevented by selection on females to resist costly matings and selection on males to stay competitive given they will enter fewer matings if they are infected.

When the cost of SA traits occur through viability, conflict escalation occurs in response to either a viability-reducing STI or a reproduction-reducing STI. However, a coevolutionary response from the STI occurs only with a viability-reducing STI. As known from past virulence theory (Anderson and May, 1982; Ewald, 1983), the transmission-virulence trade-off can be thought of as a trade-off between current and future transmission for the STI, the latter of which requires the current host's survival. In cases where host mortality is higher for reasons not directly due to the disease (e.g., higher extrinsic mortality or higher investment into SA traits carrying viability costs), then future transmission is down weighted and the disease evolves higher virulence (i.e., increased investment in current transmission). This logic does not apply to a reproduction-reducing STI. As modeled here, the transmission-virulence trade-off in a reproduction-reducing STI occurs because increased transmission *given a mating* comes at the expense of reducing a male's probability of successfully obtaining a mate. That is, the two components of this trade-off both affect current transmission. Thus, their value relative to one another is unaffected by extrinsic factors that alter the value of future transmission.

One of the costs we did not explore in depth is the risk of females remaining unfertilized. In the simulation model, a female achieved her full fecundity provided that she mated with at least one male. However, if fertilization was not guaranteed by mating, the increased risk of being left unfertilized would be expected to affect the evolution of female resistance. Thrall et al. (1997)

constructed a model investigating how male and female mating behaviour affected reproductive success in the presence of an STI. At high disease prevalence, females could achieve the same fitness by being monogamous and minimizing infection risk or by being promiscuous and minimizing the risk of being left unfertilized but increasing the risk of infection. It is possible that if there were higher probabilities of females being unfertilized in our model, divergent female strategies (low and high resistance) would be maintained.

We investigated the full three-way evolutionary interaction over a range of mating costs to females. However, many empirical investigations of sexual conflict in natural systems have reported females suffer a cost of harassment instead of, or in addition to, the cost of mating (Alcock et al., 1977; Rowe, 1994; Stone, 1995; Jormalainen, 1998; Watson et al., 1998). At high male densities or male-biased sex ratios, the cost of rejecting harassing males can become so great that females are selected to decrease resistance, increasing overall mating activity in these systems (Rowe, 1992; Rowe et al., 1994; Lauer et al., 1996). However, the introduction of a STI would effectively increase the cost of mating, possibly tipping the balance in favour of high resistance for females.

The majority of models that have investigated the evolution of host mating strategies in the presence of an STI have assumed there is sexual selection, but no sexual conflict. The distinction between male attractiveness and female preference versus male persistence and female resistance has important consequences for the evolution of an STI. Choosiness may help females gain indirect benefits from mating with a preferred male. Resistance on the other hand helps females avoid the direct costs of mating (Gavrilets et al., 2001). Unless indirect benefits are strong (Thrall et al., 1997; Boots and Knell, 2002), the presence of an STI will cause selection for non-choosy females because the most popular males have high infection prevalence (Thrall et al., 2000). In a system with sexual conflict, those males with the highest persistence traits would be more likely than average males to be infected, adding to the cost of mating for females. Females do not reduce their risk of mating with such males by having lower resistance (i.e., lower resistance is not equivalent to being less choosy because the latter can mean less discriminant mating without changing mating frequency). A female with lower resistance may have a lower fraction of her matings with high persistence (probable STI-carrying) males but she will not have a fewer number of matings with such males.

Moreover, she will have more total matings, increasing her infection risk. Consistent with this, we found that the presence of a viability-reducing STI resulted in increased female resistance, which might be construed as increased choosiness, opposite to what is observed in sexual selection models. On the other hand, a reproduction-reducing STI results in decreased female resistance, which might be construed as decreased choosiness. Though this would appear to match the outcome of sexual selection models, the reason for this result is very different. In the sexual conflict model, reduced female resistance evolves not to avoid infection but rather because the STI reduces the mating effort exhibited by infected males so females do not need to invest as heavily in their resistance trait.

For the most part, we have assumed that infection does not directly alter a male's persistence or a female's resistance. However, in some cases STIs manipulate host behaviour in ways that directly affect sexual conflict. An STI that influences male competitive ability could change the relative costs of mating. For example, parasitized males can be less competitive (Siva Jothy and Plaistow, 1999; Thomas et al., 1999), decreasing the risks of mating for females in a population with a highly prevalent STI. This is the scenario we modeled by allowing a reproduction-reducing STI to decrease mating probability for infected males. Conversely, as in the milkweed leaf beetle (Abbot and Dill, 2001), STI-infected males can be more aggressive than their uninfected counterparts, which could increase the number of matings and therefore the costs to females. Alternatively, the STI may manipulate host behaviour in such a way that its interests are aligned with one sex. It has been suggested that an STI that reduced female remating rate would be beneficial for males (Knell and Webberley, 2004) because a male that infects his mate would reduce her remating rate and ensure his own paternity. If the benefits of reducing sperm competition outweigh the costs of the STI, males may be selected to increase persistence and consequently their likelihood of acquiring an STI. Similarly, there is some evidence that infection by an STI increases oviposition rates in the fall army worm moth, meaning that males could benefit from acquiring and transmitting an STI (Simmons and Rogers, 1994). There are numerous ways males and females could evolve in response to these changes in host mating behaviour. Overall, these examples suggest that a change in the cost structure in the presence of an STI could affect the outcome of sexual conflict in natural

477 systems.

478       There are many well-known examples of STIs and sexual conflict but we are aware of no systems  
479 where both are well studied. Evidence of sexual conflict and sexually transmitted diseases has  
480 been reported in ungulates (conflict: Bro-Jørgensen 2010; STI: Lockhart et al. 1996), *Drosophila*  
481 (conflict: e.g., Rice et al. 2006; STI: Knell and Webberley 2004), and the two-spot ladybird *Adalia*  
482 *bipunctata* (conflict: Haddrill et al. 2013; STI: Webberley et al. 2002; Ryder et al. 2005). Studies  
483 of sexually antagonistic traits in populations infected with a viability- or reproduction-reducing  
484 STI should look for escalated or de-escalated trait values, respectively, compared to populations  
485 where the STI is absent. Research on viability-reducing STIs should compare different populations  
486 or closely related host species that experience different persistence, resistance, or mating costs.  
487 Variation in the costs of sexually antagonistic host traits could arise between populations if, for  
488 example, the persistence or resistance trait made the bearer more vulnerable to predation in an  
489 open versus closed habitat (see Fricke et al., 2009, for a discussion of the dependence of sexually  
490 antagonistic selection on environmental conditions). Higher mortality rates in one habitat should  
491 select for higher virulence in an endemic viability-reducing STI. Additionally, we expect lower  
492 disease prevalence in populations where male persistence is strongly selected against and there are  
493 high costs of mating or low costs of resistance for females, i.e., low mating rate will limit STI  
494 transmission.

495       We have shown that an STI has the potential to influence the outcome of sexually antagonistic  
496 coevolution. Because STIs are ubiquitous in nature (Lockhart et al., 1996), they should co-occur  
497 with sexual conflict often enough that it is worth considering how STIs change sexually antagonistic  
498 selection. Furthermore, considering the full coevolutionary interaction has important implications  
499 for both the susceptibility of a host population to invasion of a new STI and the level of virulence  
500 expected to evolve.

## 501 **Acknowledgements**

502 This work was supported by the Natural Sciences and Engineering Research Council of Canada  
503 (Discovery Grant to AFA and Alexander Graham Bell Canada Graduate Scholarship to AMW).

504 We would like to thank Samuel Alizon and Philip Greenspoon for comments on an earlier version  
505 of the manuscript.

## 506 Supplemental Information

### 507 Reproduction Costs for Sexually Antagonistic Traits

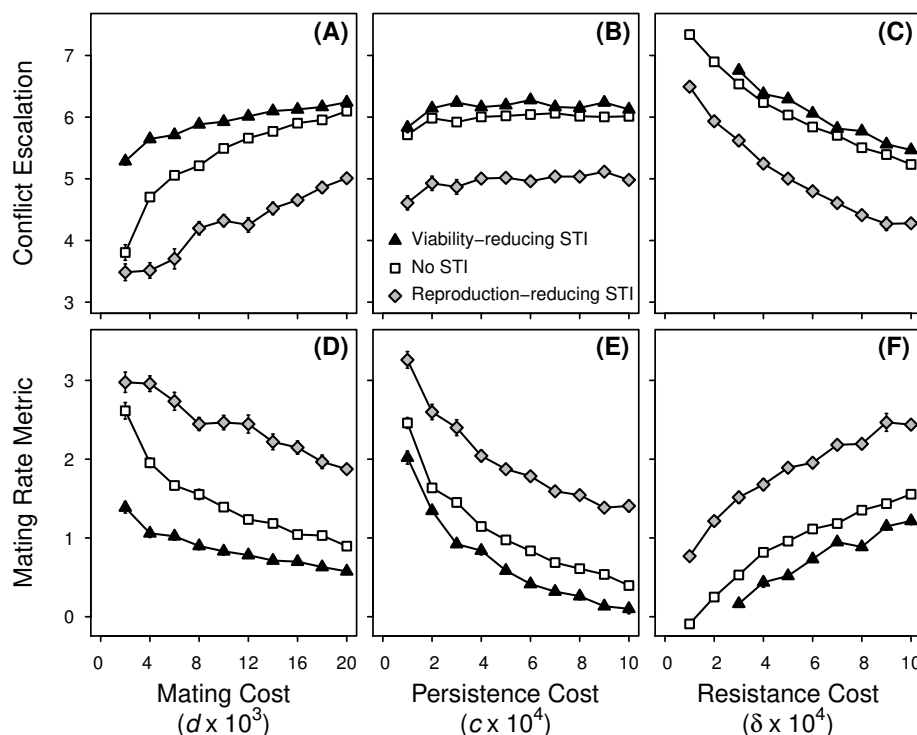

Figure S1: The outcome of coevolution between males and females in the absence of an STI and in the presence of two types of evolving STIs. Both sexes pay reproduction costs for expressing sexually antagonistic traits. Shown here are the degree of escalation in sexual conflict, measured as the average of  $y$  and  $x$  (A - C), and the difference between persistence,  $y$ , and resistance,  $x$  (D - F); values are at evolutionary equilibrium. The mating rate is an increasing function of the difference between male persistence and female resistance ( $y - x$ ); thus, we label this difference the ‘mating rate metric’. Simulations with an evolving STI began at the STI-absent host trait values and the results for a reproduction-reducing STI (diamonds) and a viability-reducing STI (triangles) are a three-way evolutionary equilibrium with the STI at evolutionary equilibrium virulence  $v$  (see Fig. 4). Parameter values (unless shown otherwise):  $\alpha = 10$ ,  $\mu = 0.2$ ,  $b = 4$ ,  $K = 1000$ ,  $w = 1$ , with  $c = 0.0005$ ,  $\delta = 0.0005$ ,  $d = 0.02$ . Each point represents the average of 20 independent simulations  $\pm$  standard error. Simulations in which the disease went extinct are excluded from calculating the average. At very low resistance costs, a viability-reducing STI went extinct in 100% of simulations (see Fig. S2) and there is no data for the three-way evolutionary equilibrium.

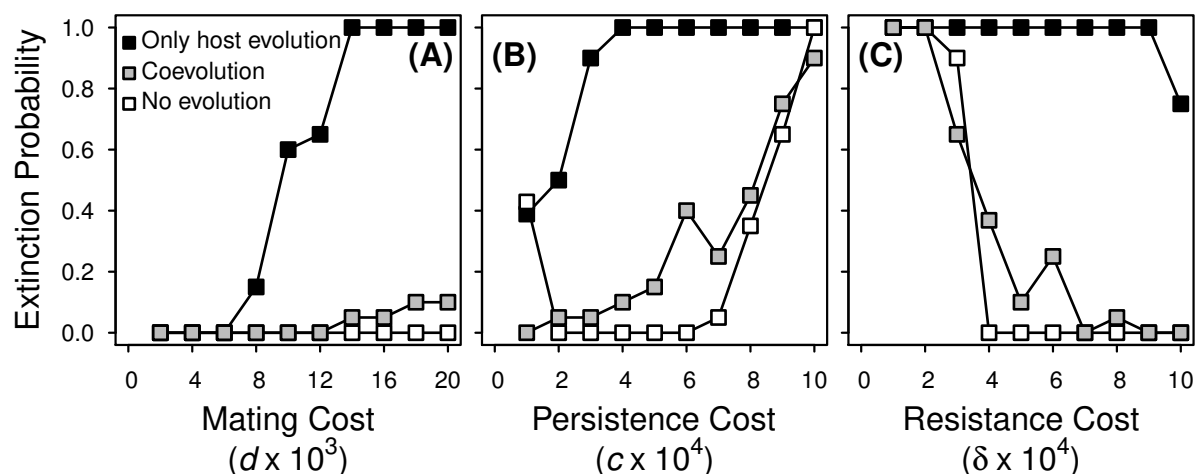

Figure S2: Fraction of simulation runs where a highly virulent viability-reducing STI was driven extinct in hosts paying reproduction costs. The parasite was introduced with  $v = 0.8$  at the STI-absent male persistence and female resistance host trait values and neither host nor parasite evolved (open symbols), host traits evolved in the presence of a non-evolving parasite (black symbols), or hosts and STI both evolved (gray symbols). Parameter values (unless shown otherwise):  $\alpha = 10$ ,  $\mu = 0.2$ ,  $b = 4$ ,  $K = 1000$ ,  $w = 1$ , with  $c = 0.0005$ ,  $\delta = 0.0005$ , and  $d = 0.02$ . The extinction probability was determined from 20 independent simulations.

## 508 Analytical Model

509 We use a system of differential equations to describe sexually antagonistic coevolution in a popula-  
 510 tion of haploid hosts (parameter definitions summarized in Table 1). Most parameters are the same  
 511 as the individual-based simulations with the exception of  $\alpha$ , which captures the sexual encounter  
 512 rate as a fraction of the density-dependent interaction of males and females (instead of  $\alpha$  being a  
 513 fixed number of males that a female encounters in the computer simulation model). The probability  
 514 of a female not mating is described by  $\gamma[M] = (1 - \phi[u])^\alpha M$ , where  $\phi[u] = y - x$  (as above) and  
 515  $M$  is the number of males in the host population.

516 The ecological dynamics are captured by the following system of equations:

$$\frac{dM}{dt} = \frac{1}{2}Fb\left(1 - \frac{M+F}{K}\right)(1 - \gamma[M]) - (ce^y + \mu_m)M \quad (1a)$$

$$\frac{dF}{dt} = \frac{1}{2}Fb\left(1 - \frac{M+F}{K}\right)(1 - \gamma[M]) - (d\alpha M\phi[u] + \delta e^x + \mu_f)F \quad (1b)$$

517 We find evolutionary stable (ESS) persistence and resistance,  $y^*$  and  $x^*$ , respectively, using se-  
 518 quential evolutionary invasion analyses for multiple traits. We plot the degree of conflict escalation,  
 519  $(y^* + x^*)/2$ , and the mating rate metric,  $u^* = y^* - x^*$ , for varying costs in Fig. S3.

520 We introduce a sexually transmitted infection into the model by dividing the host popula-  
 521 tion into susceptible and infected classes. Susceptible individuals may contract the disease by  
 522 mating with infected individuals of the opposite sex. We model transmission of the STI as density-  
 523 dependent because it is reasonable to assume that the number of matings per capita will increase  
 524 with density in systems governed by sexual conflict (i.e., at high density, females encounter more  
 525 males and thus are likely to end up mating more total times holding  $x$  and  $y$  constant). To deter-  
 526 mine a female's full cost of mating, we must track the expected number of males a female mates  
 527 with and not just the fraction of her mates that were infected (as would be done under frequency-  
 528 dependent transmission). Density-dependent sexual disease transmission has been documented in  
 529 nature (for example in two-spot ladybird beetles, *Adalia bipunctata*, Ryder et al. 2005).

530 STI virulence,  $v$ , results in higher mortality of disease carriers. We assume a trade-off between

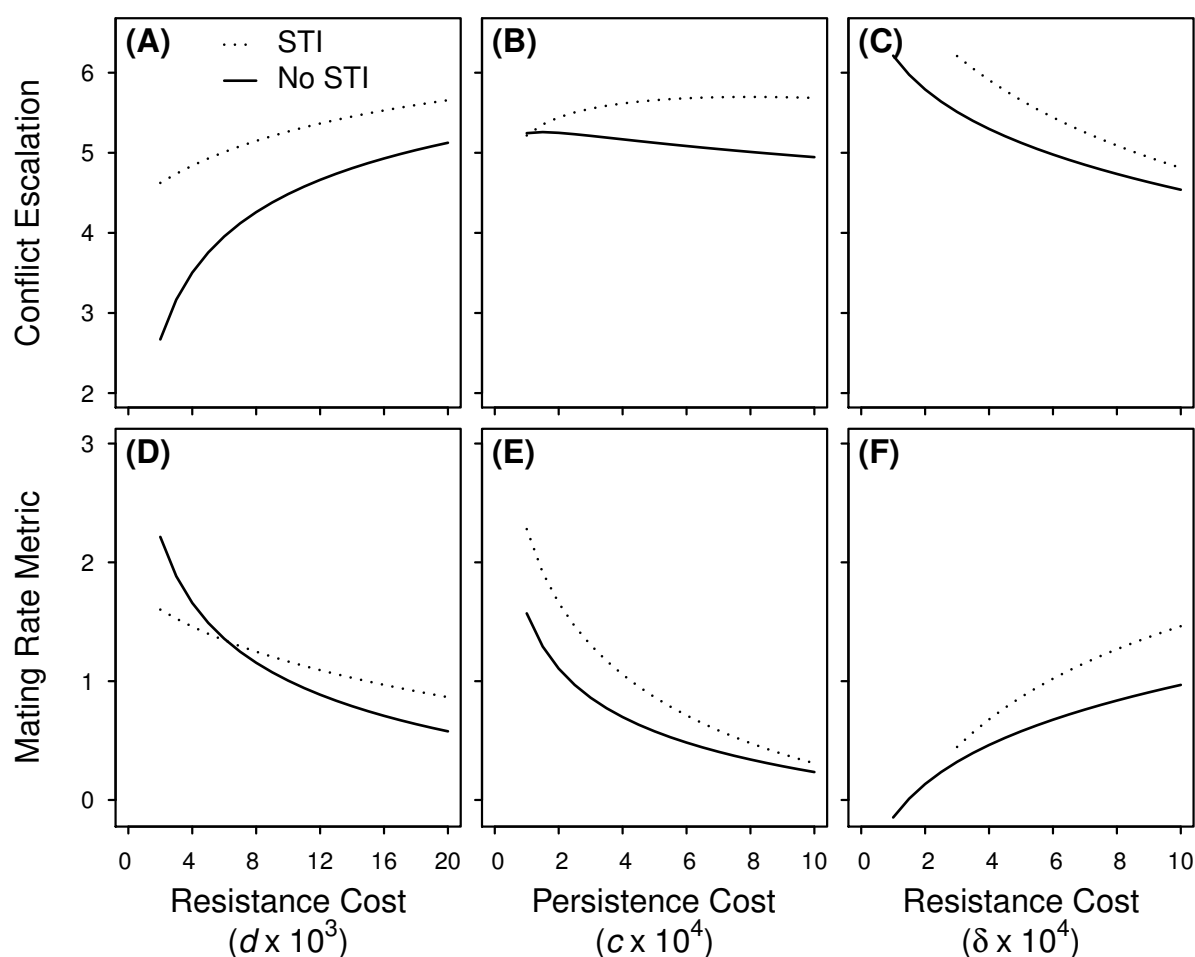

Figure S3: The outcome of coevolution between males and females in the absence of an STI and in the presence of a coevolving viability-reducing STI based on numerical solutions to the analytical model. Both sexes pay viability costs for expressing sexually antagonistic traits. Shown here are the degree of escalation in sexual conflict, measured as the average of  $y^*$  and  $x^*$  (A - C), and the difference between persistence,  $y^*$ , and resistance,  $x^*$  (D - F); values are evolutionarily stable strategies (ESS). The mating rate is an increasing function of the difference between male persistence and female resistance ( $y^* - x^*$ ); thus, we label this difference the ‘mating rate metric’. The results shown are a three-way co-ESS with an STI with ESS virulence  $v^*$  (see Fig. S4). Parameter values (unless shown otherwise):  $\alpha = 0.03$ ,  $\mu = 0.2$ ,  $b = 4$ ,  $K = 1000$ ,  $w = 1$ , with  $c = 0.0005$ ,  $\delta = 0.0005$ ,  $d = 0.02$ . At very low resistance costs, there was no co-ESS with the STI present.

transmission and virulence such that the transmission rate during mating is a saturating function of virulence  $\beta[v] = v/(w+v)$ , where  $w$  determines the shape of the function (i.e., low values of  $w$  cause the transmission benefits of increased virulence to saturate more quickly). The epidemiological dynamics are described by the following set of differential equations:

$$\frac{dS_m}{dt} = \frac{1}{2}\psi[S_m, S_f, I_m, I_f] - \alpha I_f \phi[u] \beta[v] S_m - (ce^y + \mu_m) S_m \quad (2a)$$

$$\frac{dS_f}{dt} = \frac{1}{2}\psi[S_m, S_f, I_m, I_f] - \alpha I_m \phi[u] \beta[v] S_f - (d\alpha(S_m + I_m)\phi[u] + \delta e^x + \mu_f) S_f \quad (2b)$$

$$\frac{dI_m}{dt} = \alpha I_f \phi[u] \beta[v] S_m - (ce^y + \mu_m + v) I_m \quad (2c)$$

$$\frac{dI_f}{dt} = \alpha I_m \phi[u] \beta[v] S_f - (d\alpha(S_m + I_m)\phi[u] + \delta e^x + \mu_f + v) I_f \quad (2d)$$

where

$$\psi[S_m, S_f, I_m, I_f] = b(S_f + I_f) \left(1 - \frac{S_m + S_f + I_m + I_f}{K}\right) (1 - \gamma[S_m, I_m]) \quad (3)$$

Similar to the STI-absent model, we find ESS persistence ( $y^*$ ), resistance ( $x^*$ ), and virulence ( $v^*$ ) using sequential evolutionary invasion analyses for multiple traits. We compare the degree of host conflict escalation and the mating rate metric to their respective values in the absence of an STI (Fig. S3). Finally, we compare STI virulence in a non-evolving host population (at its STI-absent ESS) to virulence in a coevolving host population (Fig. S4). Results are qualitatively similar to those of the individual-based computer simulations.

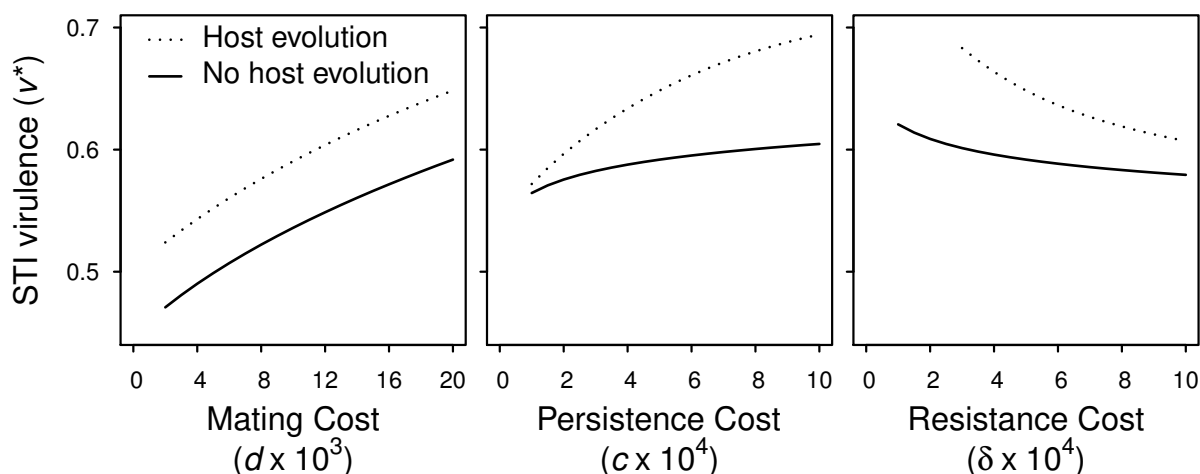

Figure S4: Evolutionary stable virulence ( $v^*$ , ESS virulence) of a viability-reducing STI in a population where hosts do not evolve (open symbols) or evolve (closed symbols). In the absence of host evolution, male persistence and female resistance were treated as constant parameters and set at their STI-absent ESS values. Parameter values (unless shown otherwise):  $\alpha = 0.03$ ,  $\mu = 0.2$ ,  $b = 4$ ,  $K = 1000$ ,  $w = 1$ , with  $c = 0.0005$ ,  $\delta = 0.0005$ ,  $d = 0.02$ . At very low resistance costs, there was no co-ESS with the STI present.

## References

- Abbot, P., and L. M. Dill. 2001. Sexually transmitted parasites and sexual selection in the milkweed leaf beetle, *Labidomera clivicollis*. *Oikos* 92:91–100.
- Alcock, J., C. E. Jones, and S. L. Buchmann. 1977. Male mating strategies in the bee *Centris pallida* fox (Anthophoridae: Hymenoptera). *American Naturalist* 111:145–155.
- Anderson, R. M., and R. M. May. 1982. Coevolution of hosts and parasites. *Parasitology* 85:411–426.
- Arnqvist, G. 1989. Sexual selection in a water strider: the function, mechanism of selection and heritability of a male grasping apparatus. *Oikos* 56:344–350.
- Arnqvist, G., and L. Rowe. 2002. Correlated evolution of male and female morphologies in water striders. *Evolution* 56:936–947.

- 553 ———. 2005. Sexual Conflict. Princeton University Press, USA.
- 554 Ashby, B., and M. Boots. 2015. Coevolution of parasite virulence and host mating strategies.  
555 Proceedings of the National Academy of Sciences 112:13290–13295.
- 556 Bateman, A. J. 1948. Intra-sexual selection in *Drosophila*. Heredity 2:349–368.
- 557 Best, A., and A. White. 2009. The implications of coevolutionary dynamics to host-parasite inter-  
558 actions. American Naturalist 173:779–791.
- 559 Boots, M., and R. Knell. 2002. The evolution of risky behaviour in the presence of a sexually  
560 transmitted disease. Proceedings of the Royal Society B: Biological Sciences 269:585–589.
- 561 Bro-Jørgensen, J. 2010. Intra- and intersexual conflicts and cooperation in the evolution of mating  
562 strategies: lessons learnt From ungulates. Evolutionary Biology 38:28–41.
- 563 Day, T., and J. G. Burns. 2003. A consideration of patterns of virulence arising from host-parasite  
564 coevolution. Evolution 57:671–676.
- 565 Ewald, P. W. 1983. Host-parasite relations, vectors, and the evolution of disease severity. Annual  
566 Review of Ecology and Systematics 14:465–485.
- 567 Fricke, C., J. Perry, T. Chapman, and L. Rowe. 2009. The conditional economics of sexual conflict.  
568 Biology Letters 5:671–674.
- 569 Gandon, S., P. Agnew, and Y. Michalakis. 2002. Coevolution between parasite virulence and host  
570 life-history traits. American Naturalist 160:374–388.
- 571 Gavrillets, S., G. Arnqvist, and U. Friberg. 2001. The evolution of female mate choice by sexual  
572 conflict. Proceedings of the Royal Society B: Biological Sciences 268:531–539.
- 573 Gavrillets, S., and T. I. Hayashi. 2006. The dynamics of two- and three-way sexual conflicts over  
574 mating. Philosophical Transactions of the Royal Society B: Biological Sciences 361:345–354.

575 Haddrill, P. R., M. E. N. Majerus, and D. Shuker. 2013. Variation in male and female mating  
576 behaviour among different populations of the two-spot ladybird, *Adalia bipunctata* (Coleoptera:  
577 Coccinellidae). *European Journal of Entomology* 110:87–93.

578 Immerman, R. S. 1986. Sexually transmitted disease and human evolution: survival of the ugliest.  
579 *Human Ethology Newsletter* 4:6–7.

580 Immerman, R. S., and W. C. Mackey. 1997. Establishing a link between cultural evolution and  
581 sexually transmitted diseases. *Genetic, Social, and General Psychology Monographs* 123:441–460.

582 Jormalainen, V. 1998. Precopulatory mate guarding in crustaceans: male competitive strategy and  
583 intersexual conflict. *Quarterly Review of Biology* 73:275–304.

584 Knell, R. 1999. Sexually transmitted disease and parasite-mediated sexual selection. *Evolution*  
585 53:957–961.

586 Knell, R. J., and K. M. Webberley. 2004. Sexually transmitted diseases of insects: distribution,  
587 evolution, ecology and host behaviour. *Biological Reviews* 79:557–581.

588 Kokko, H., E. Ranta, G. Ruxton, and P. Lundberg. 2002. Sexually transmitted disease and the  
589 evolution of mating systems. *Evolution* 56:1091–1100.

590 Lauer, M. J., A. Sih, and J. J. Krupa. 1996. Male density, female density and inter-sexual conflict  
591 in a stream-dwelling insect. *Animal Behaviour* 52:929–939.

592 Lipsitch, M., and M. A. Nowak. 1995. The evolution of virulence in sexually transmitted HIV/AIDS.  
593 *Journal of Theoretical Biology* 174:427–440.

594 Lockhart, A. B., P. H. Thrall, and J. Antonovics. 1996. Sexually transmitted diseases in animals:  
595 ecological and evolutionary implications. *Biological Reviews* 71:415–471.

596 Otto, S. P., and T. Day. 2007. *A biologist's guide to mathematical modeling in ecology and*  
597 *evolution*. Princeton University Press, Princeton, NJ.

598 Rice, W. R., and B. Holland. 1997. The enemies within: intergenomic conflict, interlocus contest  
599 evolution (ICE), and the intraspecific Red Queen. *Behavioral Ecology and Sociobiology* 41:1–10.

600 Rice, W. R., A. D. Stewart, E. H. Morrow, J. E. Linder, N. Orteiza, and P. G. Byrne. 2006.  
601 Assessing sexual conflict in the *Drosophila melanogaster* laboratory model system. Philosophical  
602 Transactions of the Royal Society B: Biological Sciences 361:287–299.

603 Robinson, B. W., and R. W. Doyle. 1985. Trade-off between male reproduction (amplexus) and  
604 growth in the amphipod *Gammarus lawrencianus*. Biological Bulletin 168:482–488.

605 Rowe, L. 1992. Convenience polyandry in a water strider: foraging conflicts and female control of  
606 copulation frequency and guarding duration. Animal Behaviour 44:189–202.

607 ———. 1994. The costs of mating and mate choice in water striders. Animal Behaviour 48:1049–  
608 1056.

609 Rowe, L., G. Arnqvist, A. Sih, and J. J. Krupa. 1994. Sexual conflict and the evolutionary ecology of  
610 mating patterns: water striders as a model system. Trends in Ecology and Evolution 9:289–293.

611 Rowe, L., E. Cameron, and T. Day. 2005. Escalation, retreat, and female indifference as alternative  
612 outcomes of sexually antagonistic coevolution. American Naturalist 165:S5–S18.

613 Ryder, J. J., K. M. Webberley, M. Boots, and R. J. Knell. 2005. Measuring the transmission  
614 dynamics of a sexually transmitted disease. Proceedings of the National Academy of Sciences  
615 102:15140–15143.

616 Simmons, A. M., and C. E. Rogers. 1994. Effect of an ectoparasitic nematode, *Noctuidonema guya-*  
617 *nense*, on adult longevity and egg fertility in *Spodoptera frugiperda* (Lepidoptera: Noctuidae).  
618 Biological Control 4:285–289.

619 Siva Jothy, M. T., and S. J. Plaistow. 1999. A fitness cost of eugregarine parasitism in a damselfly.  
620 Ecological Entomology 24:465–470.

621 Stone, G. N. 1995. Female foraging responses to sexual harassment in the solitary bee *Anthophora*  
622 *plumipes*. Animal Behaviour 50:405–412.

- 623 Thomas, F., E. Oget, P. Gente, D. Desmots, and F. Renaud. 1999. Assortative pairing with respect  
624 to parasite load in the beetle *Timarcha maritima* (Chrysomelidae). *Journal of Evolutionary*  
625 *Biology* 12:385–390.
- 626 Thrall, P. H., J. Antonovics, and J. D. Bever. 1997. Sexual transmission of disease and host mating  
627 systems: within-season reproductive success. *American Naturalist* 149:485–506.
- 628 Thrall, P. H., J. Antonovics, and A. P. Dobson. 2000. Sexually transmitted diseases in polygynous  
629 mating systems: prevalence and impact on reproductive success. *Proceedings of the Royal Society*  
630 *B: Biological Sciences* 267:1555–1563.
- 631 Watson, P. J., G. Arnqvist, and R. R. Stallmann. 1998. Sexual conflict and the energetic costs of  
632 mating and mate choice in water striders. *American Naturalist* 151:46–58.
- 633 Webberley, K., G. Hurst, and J. Buszko. 2002. Lack of parasite-mediated sexual selection in a  
634 ladybird/sexually transmitted disease system. *Animal Behaviour* 63:131–141.
